# Supplementary material for: RNA m6a Methylation Regulator Expression in Castration-Resistant Prostate Cancer Progression and Its Genetic Associations
Source: MDPI journal article supplement (doi:10.3390/cancers16071303), 2024-03-27
Supplement: s1 [file s1]

# **Supplementary Materials: RNA m6a Methylation Regulator Expression in Castration-Resistant Prostate Cancer Progression and its Genetic Associations**

Chamikara Liyanage, Achala Fernando, Audrey Chamberlain, Afshin Moradi and Jyotsna Batra

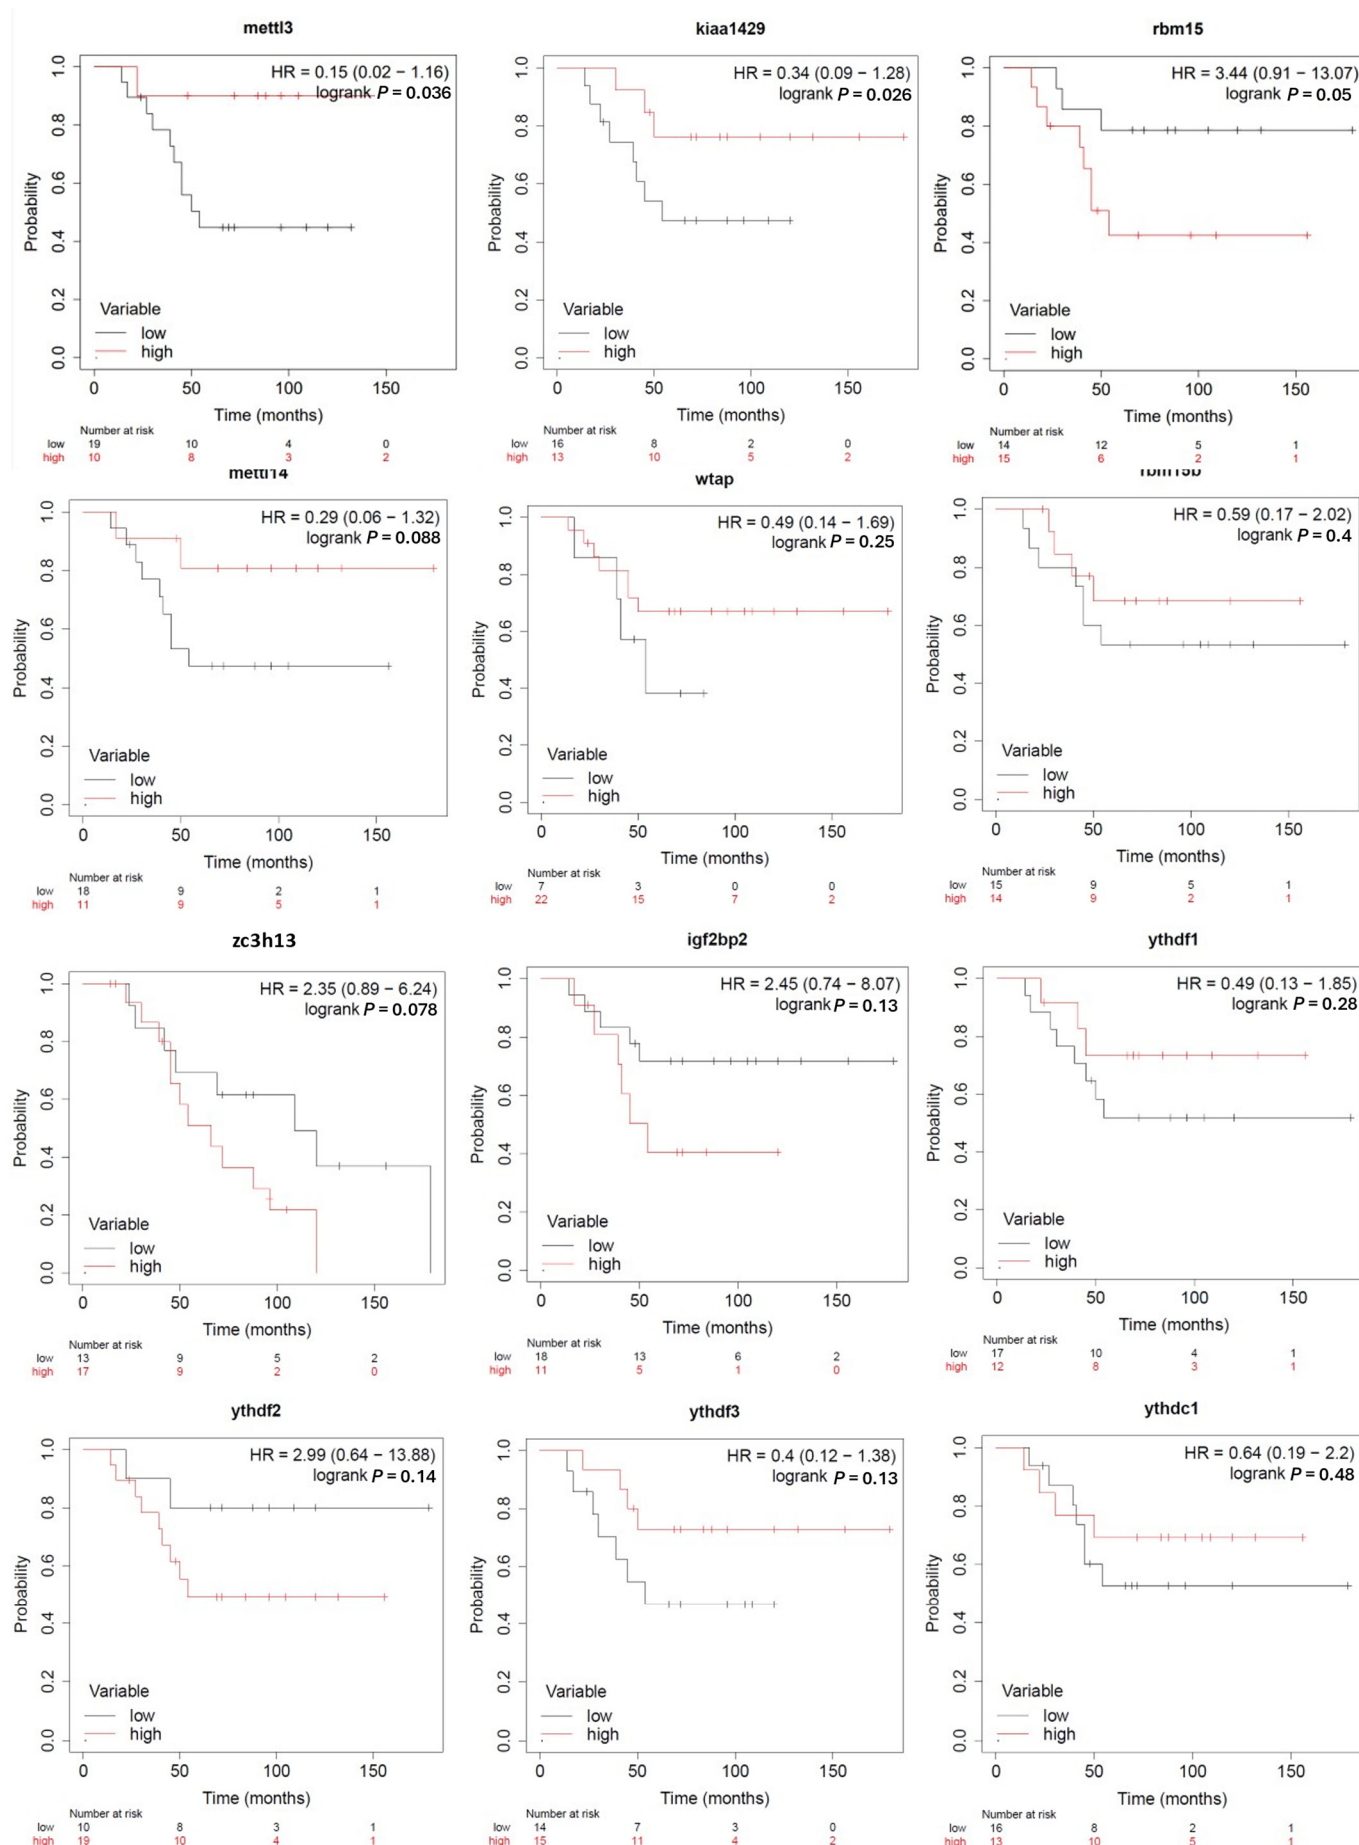

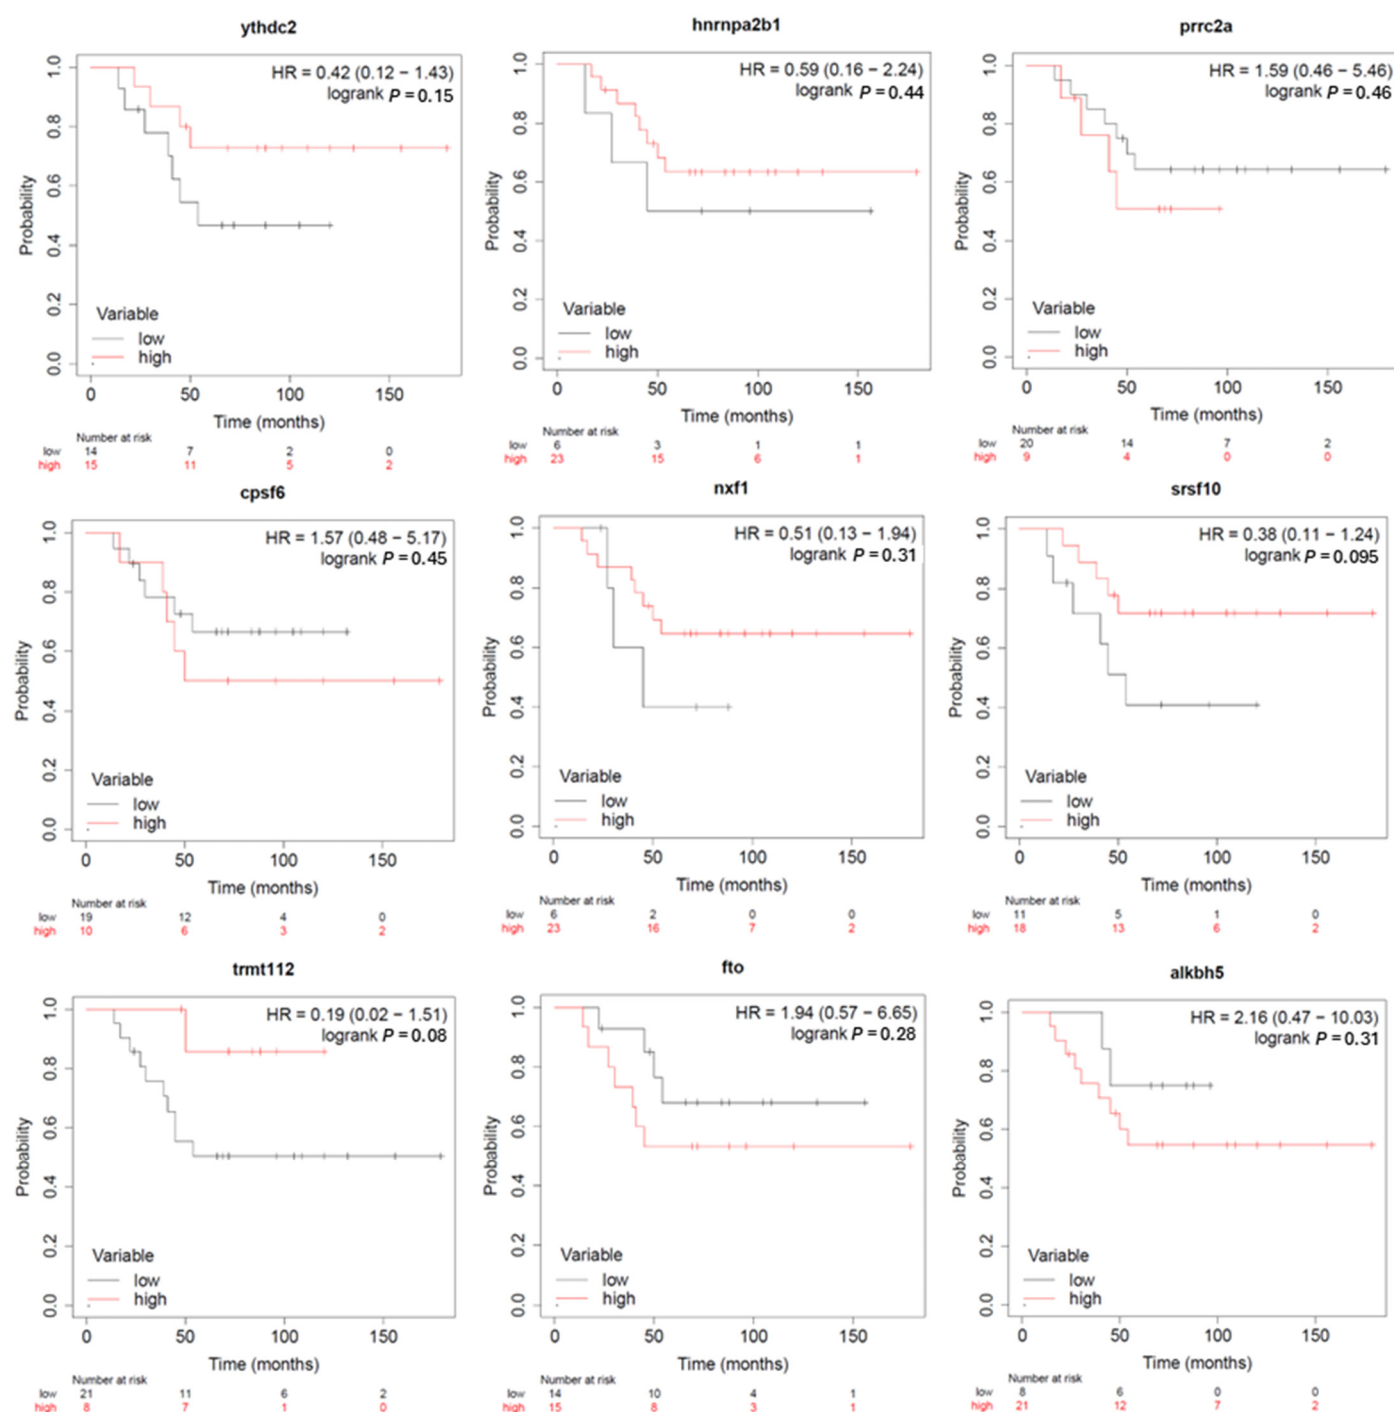

**Figure S1.** Univariate Kaplan-Meier Survival analysis of m6A methylation regulators for overall survival of CRPC patients after the first hormone refractory therapy. Based on the univariate cox regression analysis performed using the Kaplan-Meier Plotter, 18 m6A regulators showed no significant correlation between their expression and overall survival of CRPC patients. HR: hazard ratio; low: low expression of the m6A regulator; high: high expression of the m6A regulator.

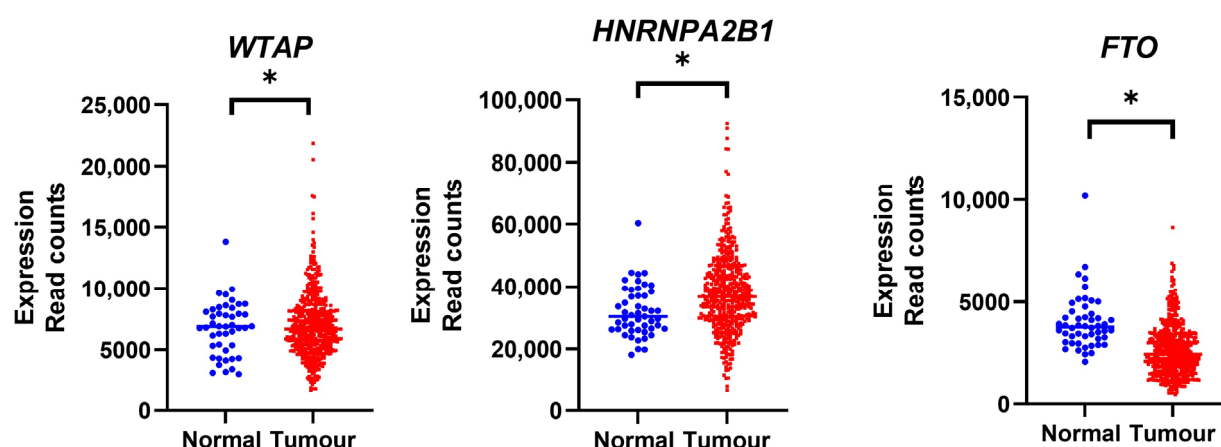

**Figure S2.** Three m6A regulator genes were found to be differentially expressed in primary PCa ( $n = 450$ ) tissue compared to healthy controls ( $n = 49$ ) using The Cancer Genome Atlas Program (TCGA) RNAseq data, \*  $p < 0.05$ .

**Table S1.** SWATH-MS label-free quantification of m6A regulator expression in prostate cancer cell lines.

**Table S2.** SWATH-MS label-free quantification of m6A regulator expression in androgen- and anti-androgen-treated LNCaP cell line.

**Table S3.** RNA sequencing transcriptomic analysis of m6A regulator expression in androgen- and anti-androgen-treated LNCaP cell line.

**Table S4.** RNA sequencing analysis of m6A regulator expression in prostate cancer tumor and adjacent normal tissues.

**Table S5.** Log<sub>2</sub> median expression data for m6A regulatory genes recruited from the Grasso dataset (N = Normal Tissue, T = Localized Prostate Cancer, WA = CRPC).

**Table S6.** Survival data of CRPC patients after first hormone therapy from the Grasso dataset (survival event at 5 years 1 = Dead, 0 = Alive).

**Table S7.** PCa risk loci association with m6A regulator genes.

**Table S1–S7.** are attached separately as an Excel file.
